# Supplementary material for: Regulation of tissue-specific expression of SPATULA, a bHLH gene involved in carpel development, seedling germination, and lateral organ growth in Arabidopsis
Source: PubMed Central journal article supplement — J Exp Bot. 2010 Feb 22;61(5):1495–508. doi: 10.1093/jxb/erq015 (PMC2837263; doi:10.1093/jxb/erq015), 2010-02-22
Supplement: erq015_1.pdf [file erq015_1.pdf]

Regulation of tissue specific expression of *SPATULA*, a bHLH gene involved in carpel development, seedling germination and lateral organ growth in *Arabidopsis*

Michael Groszmann, Yasmin Bylstra, Edwin R Lampugnani and David R Smyth

**Supplementary Table S1.** Primers used for PCR in this study. Sequences underlined are restriction sites.

A. Primers used for the generation of 5' truncations of the pSPT-1262 clone

| Primer Name | 5' to 3' Primer Sequence                      |
|-------------|-----------------------------------------------|
| pSPT-1262F  | ATT <u>ACTGCAGCTTTTAGCAATTGTCTCC</u> CATA     |
| pSPT-1203F  | AAATTGA <u>AGCTTCGAGGTTAAGTGAATGTTGC</u>      |
| pSPT-313F   | CACA <u>AGCTTTGAGAAAACAGATAAAGGTT</u>         |
| pSPT-260F   | CACA <u>AGCTTCTAACTACGAGTAGTAGTTAG</u>        |
| pSPT-221F   | CACA <u>AGCTTGAGGAAAAGTTTTGGGAGAG</u>         |
| pSPT-1262R  | CGAGACTT <u>CTCGAGTTATCTGCAT</u>              |
| pSPT-100R   | GGGGTACCTCATT <u>TAGTTAAAAGTGAAGGTAGCTGTT</u> |
|             |                                               |

B. Primers used for the generation of BoSPT-2660 and pBoSPT-1857 from BAC genomic clones BOMRKN39 and BOMRY82 of *Brassica oleracea*

| Primer           | 5' to 3' Primer Sequence                   |
|------------------|--------------------------------------------|
| TF (full insert) | TGTAAAACGACGGCCAGT                         |
| TR (full insert) | CAGGAAACAGCTATGACC                         |
| BOMKN39TR        | AAGCACCCATTAATCATGC                        |
| BOMKN39TF        | GCCAGGTTGGACACAGAAGT                       |
| BOMRY82TR        | TCGATTTAATTGTCGTTGTAGGAA                   |
| BOMRY82TF        | CGTGCACAATTCTAAAACGA                       |
| 39BoSPTpromF     | CGCGGTACCCTAAGCATTCTCTCTAAGCACC            |
| 39BoSPTpromR     | GTCA <u>AGCTTAGAGGGTGGATGATGATTGC</u>      |
| 82BoSPTpromF     | CCGCTCGAGTTAATCAA <u>ACTCTACCATGTCACTT</u> |
| 82BoSPTpromR     | CGCGGTACCAATTAATATAATAGTGGGTGAGATCC        |
|                  |                                            |

C. Primers used for site directed mutagenesis of putative Auxin Response Elements and E-boxes in pSPT-1262 in pBluescript

| <b>Primer Name</b>         | <b>5' to 3' Primer Sequence</b>          |
|----------------------------|------------------------------------------|
| Upstream flanking primer   | CGAGGTTCGACGGTATGGATA <u>AAGCTT</u> G    |
| Downstream flanking primer | CGTCTCTTCTCGAGTTATCTGCATGTGG             |
| MutAuxRE2(1)               | GTAGTTTAGTGCGGCTCACGTGCGAC               |
| MutAuxRE2(2)               | GTCGCACGTGAGCCGCACTAAACTAC               |
| MutAuxRE1(1)               | AGAGAGGGAGAGAGGCATGCACGCGCCAGCT          |
| MutAuxRE1(2)               | AGCTGGCGCGTGCATGCCTCTCTCCCTCTCT          |
| MutAuxRE3(1)               | AGAGA <u>AAGCTT</u> AGCAATAGACTCCCATATGC |
| MutCE#2(1)                 | GTGTGTCTCACGAACGACGAGGAAA                |
| MutCE#2(2)                 | TTTCTCGTCGTTTCGTGAGACACAC                |
| MutCE#1(1)                 | TTCTTAGCTGGTTTGTGACAGACACTC              |
| MutCE#1(2)                 | GAGTGTCTGTCACAAACCAGCTAAGAA              |
| MutCE#3(1)                 | AGAGAAGCTTAGAGATTGTCTCCCATAAACTTTTCCTTTG |
|                            |                                          |
