# Supplementary material for: Regulation of tissue-specific expression of SPATULA, a bHLH gene involved in carpel development, seedling germination, and lateral organ growth in Arabidopsis
Source: PubMed Central journal article supplement — J Exp Bot. 2010 Feb 22;61(5):1495–508. doi: 10.1093/jxb/erq015 (PMC2837263; doi:10.1093/jxb/erq015), 2010-02-22

Regulation of tissue specific expression of *SPATULA*, a bHLH gene involved in carpel development, seedling germination and lateral organ growth in *Arabidopsis*

Michael Groszmann, Yasmin Bylstra, Edwin R Lampugnani and David R Smyth

**Supplementary Fig. S1.** Serial transverse sections through the shoot apical meristem and developing leaves of a 12-14 day old plant, showing expression conferred by the pSPT-6253:GUS reporter gene. In (H), the leaf primordia arising from the central meristem are labelled according to their age, from the newest leaf (1) to the oldest (11). Sections were 8  $\mu\text{m}$  thick. See Fig. 1R, in which Fig. S1F is reproduced, for additional details.

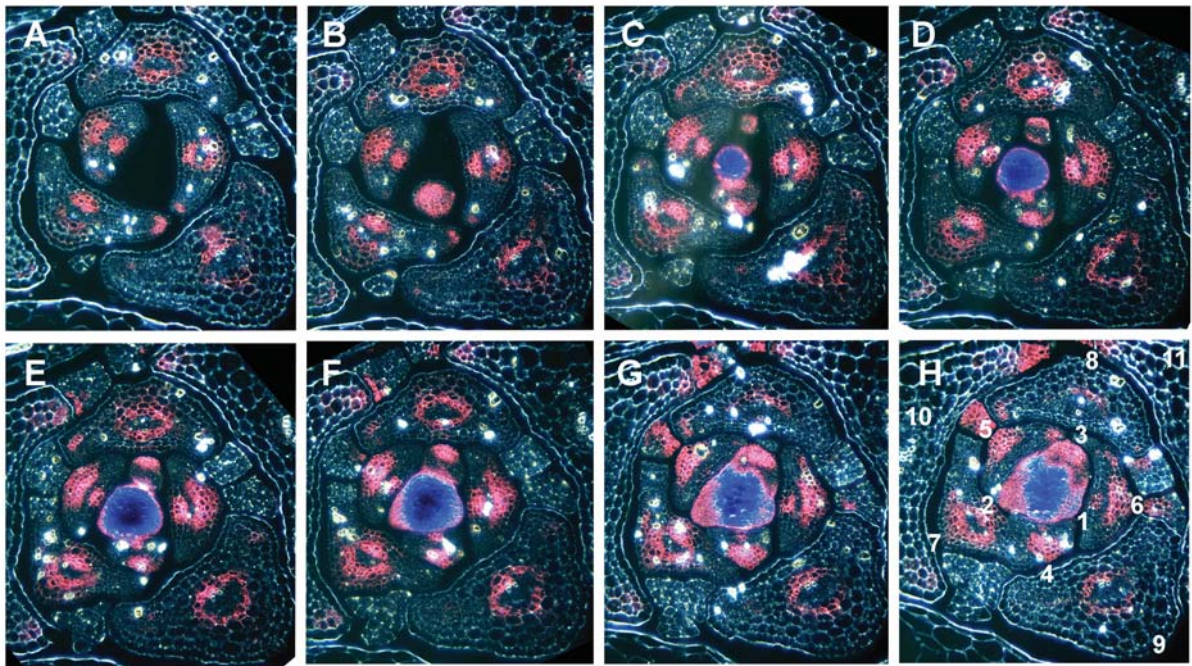

Supplement: erq015_2.pdf [file erq015_2.pdf]
