# Supplementary material for: Regulation of tissue-specific expression of SPATULA, a bHLH gene involved in carpel development, seedling germination, and lateral organ growth in Arabidopsis
Source: PubMed Central journal article supplement — J Exp Bot. 2010 Feb 22;61(5):1495–508. doi: 10.1093/jxb/erq015 (PMC2837263; doi:10.1093/jxb/erq015), 2010-02-22
Supplement: erq015_3.pdf [file erq015_3.pdf]

Regulation of tissue specific expression of *SPATULA*, a bHLH gene involved in carpel development, seedling germination and lateral organ growth in *Arabidopsis*

Michael Groszmann, Yasmin Bylstra, Edwin R Lampugnani and David R Smyth

**Supplementary Fig. S2.** Alignment of eight conserved regions of the *SPT* promoter regions of *AtSPT* (*Arabidopsis thaliana*), *BoSPT* (*Brassica oleracea*) and *BrSPTa* and *BrSPTb* (*Brassica rapa*). Residues conserved in 3 or 4 sequences are shaded grey, and gaps are indicated by a hyphen. Putative Auxin Response Elements (AuxREs) (boxed) and adjacent E-boxes (magenta) at locations 1, 2 and 3 are indicated (antisense at location 1). Also highlighted are a CCAAT box (green), a Y patch (cyan), a TCP binding site (red), a TATA box (yellow), the start of transcription (red text), and a GA element (dotted underlined). The likely commencement of translation (underlined) is shown. For *AtSPT*, this may occur at +41 (purple text) or +86 (blue text). For *Brassica SPT* genes, the first methionine codon is equivalent to the second in *Arabidopsis*.

### Region 1

|        |      |                                                      |             |                            |                      |                      |               |                       |               |                |       |       |       |     |
|--------|------|------------------------------------------------------|-------------|----------------------------|----------------------|----------------------|---------------|-----------------------|---------------|----------------|-------|-------|-------|-----|
|        |      |                                                      |             |                            |                      |                      |               | CCAAT box             |               |                |       |       |       |     |
| AtSPT  | -167 | ACCGTGAGCTGACACAAGCTCATTGCTAATGCTACAGTAACAGCTACCTTCA | ---         | CTTTAACTAAATGACAGA         | CCAAT                | CATTTAACCTCTGTTTTCTT | -71           |                       |               |                |       |       |       |     |
| BoSPT  | -207 | ACCGTGCGCTGACACAAGCTCATTGCTTTTGCTAGAGTAACAGCTACAGTCA | ---         | CTTTAGCGCTATAACAGT         | CCAAT                | CATTTAACTTCTGTGTCCA  | -112          |                       |               |                |       |       |       |     |
| BrSPTa | -143 | -----CTCATGCTTTTGCTACAGTAACAGCTA--GTCTAACTTGAAC      | TCGGTGACAGT | CCAAT                      | CATTATAACCCTTGTGTCTT | -65                  |               |                       |               |                |       |       |       |     |
| BrSPTb | -168 | ACCGTGAGCTGACATAAGCTCATTGCTTATGTTAATGTTACAGCTACCGTCA | ---         | CGTTTTACTATATGACAGT        | CCAAT                | CATTTAACCTCTGTCTCCAA | -72           |                       |               |                |       |       |       |     |
|        |      |                                                      |             |                            |                      |                      |               |                       |               |                |       |       |       |     |
|        |      | E-box AuxRE (location 1)                             |             | Y patch                    |                      | TCP                  | TATA box      |                       |               |                |       |       |       |     |
| AtSPT  | -70  | AGCTGGCGCGTGACAGACA                                  | CTC         | -----                      | TCCCTCTCTCCA         | --T                  | GCCCA         | TAAAAATCTCAAAG        | -18           |                |       |       |       |     |
| BoSPT  | -111 | ACCTGGCGCGTGACAAATAA                                 | CTCTCTCT    | GCTTTTTTTTTTTTTT           | TGGAATCCAATAA        | CTCTCTCTCTC          | ATTCCCTCTCCAC | -T                    | GCCCA         | TAAAAATAGAAAAA | -16   |       |       |     |
| BrSPTa | -64  | AGCTGGCGCGTGACAGTTACTCTATT                           | -----       | -----                      | -----                | TTCTCTTCTCCATT       | T             | GCCCA                 | TAAAAATCAAAAA | -6             |       |       |       |     |
| BrSPTb | -71  | C-CTGGCGCGTGACAAATAA                                 | CTCTCTCT    | -----                      | -----                | CTCTCTCCACTT         | C             | CCCA                  | TAAAAATCAAAAA | -18            |       |       |       |     |
|        |      |                                                      |             |                            |                      |                      |               |                       |               |                |       |       |       |     |
|        |      | +1 (AtSPT)                                           |             | +1 (BoSPT, BrSPTa, BrSPTb) |                      |                      |               | GA element            |               |                |       |       |       |     |
| AtSPT  | -17  | A-CTGTTTAAAAA                                        | ATGTTT      | TAGCTTTAACTG               | CTTTTTTTT            | TGTTGTTGGTGTAA       | ATGATATCAC    | AGAGAGAAGAAAGAGAGAGAA | -----         | GAAGC          | +77   |       |       |     |
| BoSPT  | -15  | CTCTGTTT                                             | TTTTTTT     | -----                      | CTTATATAC            | --TTGCC              | -----         | ATAAAGAGAGAAGAGAGAG   | -AGAGAAGC     | -----          | GAAGA | +47   |       |     |
| BrSPTa | -5   | CTCTG                                                | -----       | -----                      | CTTTAATC             | -GTT                 | -----         | CACAGAGAGA            | -GAGAGAG      | -AGAGAGAGCT    | GAAGC | +43   |       |     |
| BrSPTb | -17  | CTCTGTTT                                             | TTTTTTTTT   | -----                      | CTTA                 | -----                | C             | TTGCC                 | -----         | ATAACAAG       | -GAGA | ----- | GAAGA | +28 |
|        |      |                                                      |             |                            |                      |                      |               |                       |               |                |       |       |       |     |
|        |      |                                                      | Met         |                            |                      |                      |               |                       |               |                |       |       |       |     |
| AtSPT  | +78  | A                                                    | -----       | GAGAGT                     | GATG                 | -----                |               |                       |               |                |       |       |       |     |
| BoSPT  | +48  | A                                                    | -----       | GAGAGT                     | AATG                 | -----                |               |                       |               |                |       |       |       |     |
| BrSPTa | +44  | AAC                                                  | AAAAAGAA    | GAGA                       | -TAATG               | -----                |               |                       |               |                |       |       |       |     |
| BrSPTb | +29  | -                                                    | -----       | GAGAGT                     | AATG                 | -----                |               |                       |               |                |       |       |       |     |

## Region 2

```

                                AuxRE   E-box (location 2)
pAtSPT -252 GAGTAGTAGTTT-----AGTGFGT-----CTCACGTCCGACGAGGAAAAGTTTT -209
pBoSPT -485 GAGTACTAGTTTAGGAGTAGTGTGCTTAACTCTCACGCGGGACGAGGAAACTTTTT -429
pBrSPTa -265 TAGTACTAGTTTAGTA--AGTGFAT-----CTCACGTCCGACGAGGAATAGTTTT -218
pBrSPTb -226 TAGTACTAGTTTAGT--AGTGFGT-----CTCACGTCCGACGAGGAAACCCTTT -180
```

## Region 3

```

pAtSPT -518 CAAATTACTAGAAATGGA-AATACTTTTGTCAAAACAAC-AAGACGTATAACTTTGTTTTCTATAGATTAATGGAC-TTCTTAAAAATCTCTCCATCAG -422
pBoSPT -1344 CAAATTACTAAAAGTAGATAATGTTTTGTCAAAACAACCGAAGACGCATAACTTC-GTTTTCTATAAACTAATGGCA-TTGTTCAAATCTCTCCAACAA -1247
pBrSPTa -530 CAAATTACTTAAAAAAGG-AATTTTTTTGTCAACA-CAAAAGACGTATTACTTC-ATTTCTATAAACTTATGGAAGTTTTCAAATTTATCCGTCAA -446
pBrSPTb -845 CAAATTACTAAAAGTGGATAATGTTTTGTCAAAACAACGGAAAACGTATAACTTC-GTTTTCTATAAACTAACGAAA-TTGTTCAAAGTGTCTCCAATAA -761

pAtSPT -421 A-TTAAAC-----TTTTGAGAT-ATACAAATACAGTTTTTGTCTTCTAAATGATATGAATATTAACCTTTATCGATT-TCATCCG -344
pBoSPT -1246 AAATAATTGGGCTCGTTTTTTTTCTTTCCCTAAACTAAATAAATATTCATTTCTATTGTGTTTCATCCAT---ATCAAGAAGAATATACATATGCATGTT -1150
pBrSPTa -445 AATTAAAC-----TCTGAAAT---ATAAA-ATTCATTTTATCAGAGTTTCATCCGTGGTAGCAGATAGAACATGCTTG-ACATTTT -364
pBrSPTb -760 AA-TA-----TAATTCATTTGTTTTTAATAAACTAAATTAATCTTCATTTCTATTGTGTTCCATCCATATCAAGAAGAAGAATATACATATGCATCTT -656

pAtSPT -343 TAGCAGATTTCCATTTTAAATAATAAACTATGAGAAAACAGATAAAAGTTGTATATTATTTGTTACCCAAAAAAAAAAAAAAAAA -297
pBoSPT -1149 A-ACAGATTTCTATTTTAAATAATGGACTATGAGAAACCATATAAAAGGT-TGTATCATTGTTACCGAGAAAAAAAAAACATA -1069
pBrSPTa -363 ATACAGACTTCTATTTTAAACAATGGGTTACAAGAAAGCATATAAAAGCT-TGTATCATTGTTACCCAAAAAATAAAATAAA -276
pBrSPTb -655 A-ACAGATTTCTATTTTAAATAATGGACTATGATAAAACCATATAAAAGGT-TGTATAATTTGTTACCAAAGAAAAAAAAAACATA -575
```

## Region 4

```

pAtSPT -743 GAGGTATATAGTTGAAAAACACACA---CCGTAAAGTTAATAATTTTC-----ACAACACAAGAACAAATC--AAAGTCGCAAGT-AATTTAAC -662
pBoSPT -1919 GAAATGTATAGTTGAAAAGAAAAGACACCGTAAATTCAGTA--TTACTGGGTCCTGCCTGCAATACAAGAACTGATTTTAAAGTCTCACGTTAATTTAAC -1822
pBrSPTa -799 GAATTGTATAATTGAGAAGAACAG-----TAAATTCATAATTTTCAGTATTCATCGTCAATACAAGAACTGATTT-AAAGTCGCACGTTAATTTAAC -707

pAtSPT -661 GCAT--GTCAGTAGCATGGGCT -642
pBoSPT -1821 GCATATGTCAGTGGCATGGGCT -1800
pBrSPTa -706 GCATATGTCAGTAGCATGGGCT -685
```

## Region 5

E-box AuxRE E-box (location 3)

```
pAtSPT -1296 ATAATTGAATCAAAGCAGATGCTGAACAAATAGCTGCAG-CTTTTAGCAATTGCTCTCCATATGCTTTTCTTTGTTTCAAAAATGTATATACGAGG- -1199
pBoSPT -2568 ATAAT-AATTGAAAAGCGGACGATGAAAAATT-GCTGCAGGCTTTCAGTAATTGCTCTCCATTGCTTTTCTTTGGTCCAGAAAATGAAAATACGAGGA -2471
pBrSPTa -1928 ATAAT---ATGAAGGCAGCTGCTGAAAAAAT-GCTGCAGGCTTTTAGCAACTGCTCTCCATATGCTTTTCTTTGTTTTCAGAAAATGTAAATACGAGGA -1834
pBrSPTb -1835 AAAAT-AATTGAAAAGCGGACGATGAAAAATT-GCTGCAGGCTTTCAGTAATTGCTCTCCCGTTTGCTTTTCTGTGTTCCAGAAAATGTAAATACGAGGA -1738

pAtSPT -1198 ---TTAAGT-----GAATGTT--GCAATGAAATAAATGATGCAGTTG--TGCATTCATCAAGCGAACCAAGTACGATTGATGTTTTCAGTGCAA -1117
pBoSPT -2470 ---TAAATGTA CTGGTTGAATGTT--GCAGTGAACAAATGATGCAGTTAGAGCGCATTTCATCAATGGAACAAGTACGAGTATGTTTTCAGCGCAA -2377
pBrSPTa -1833 TAATTAAGTACTTATGTTTGAATGTTTTCAGTGAACAAATAATGCAGTTAGGGCGCATTTCATTAAGAGAAAAGTGCAGTATGATGTTTCTGTGCAA -1734
pBrSPTb -1737 ---TAAATGTA CTGGTTGAATGTT--GCAGTGAACAAATGATGAAGTTAGCGCGCTTCATCAATGGAACAAGTACGAGTATGTTTTCAGCGCAG -1644

pAtSPT -1116 ---AACTAAAATAAAATA -1101
pBoSPT -2376 A--AAAATATATAGAGTA -2360
pBrSPTa -1733 GTTAAAATAAAAGAAAATA -1715
pBrSPTb -1643 AGAAAACTATATAGAGGA -1625
```

## Region 6

```
pAtSPT -2593 TTCCAAGTGGGGAGTTGCTTGGGGATCTCATTGACGTGTGATCTTGAATTTTGTATAGAGATCCTAATGATCTCGTGGTCCCTCTCGCAG -2502
pBoSPT -xxxx TTCCAAGTGGGGAGTTGCTCGGGG-TC TCATTGACGTGTGATGATGAATTTATGTAAGAGACCCTAATAATCTCGTGGTCCCTCTCGCAG -xxxx
pBrSPTa-2802 TTCCAAGTGGGGAGTTATCTCGGGGCTCATTGACGTGTGATGTTGAATTTATGAAAGATATTCTAATGATCTCGTGGTCCCTTTACAG -2711
```

## Region 7

```
pAtSPT -4924 CTGATTAGGCAATAAAATAAAA-CGATTTTGCTTTCCGACTTCACCAACAAAGTCTT-----AAAGGTGTTTTACATCCCAACATGTTAT CAAA -4837
pBoSPT -xxxx CTGATAAGTCAATAAAAAATC-CGATTTTGCTTTCCGAATGCACCACAAAGTCTTGACTCTAAACGAATGAAAGGTGTTTTACATCCTGATATGTTTT AAA- -xxxx
pBrSPTa-7175 CTGTTAAGTCAATAAAAAAAACGATTTTGCTTTCCGAATGCACCACAAAGTCTTGACTCTAAACGAATGAAAGGTGTTTTACATCCTGATATGTTTT AAAA -7072
```

## Region 8

```
pAtSPT -5288 GTGGAAGTGGTGAAGAATCAATTA AACGCACACAGCTTCATCATATATTGTGCTCCTTCGCCGACAATCTTCTTACCTTATGCTTTGTTTGTCCCA -5189
pBoSPT -xxxx GTGGAAGTGGGAGAAGAATCAATTA AAC-CACACACAACTTCGT-ATAT-TTGTGTCTTTCACCAGACAATTTCTTACCTTATGCTTTGTTTGTCCCA -xxxx
pBrSPTa-7713 GTGGAAGTGGGAGAAGAATCAATTA AAC-CACACACAACTTCGT-ATAT-T-GTGTCTTTCACCAGACAATTTCTTACCTTATGCTTTGTTTGTCCCA -7618

pAtSPT -5188 TCGCTTTCAACACAAATTTCCATTATAGTAAACTCTCA -5151
pBoSPT -xxxx TCACTTTCA-CATATTTTCCATTATAGTAAACTTCA -xxxx
pBrSPTa-7617 TCACTTTCA-CATATTTTCCATTATAGTAAACTTCA -7581
```
